# Supplementary material for: Aged black garlic extract inhibits the growth of estrogen receptor-positive breast cancer cells by downregulating MCL-1 expression through the ROS-JNK pathway
Source: PubMed Central journal article supplement (PMC10289325; doi:10.1371/journal.pone.0286454), 2023-06-23

fig3 Western-blot of EMT related markers proteins in MCF-7 and MDA-MB-361 cells.

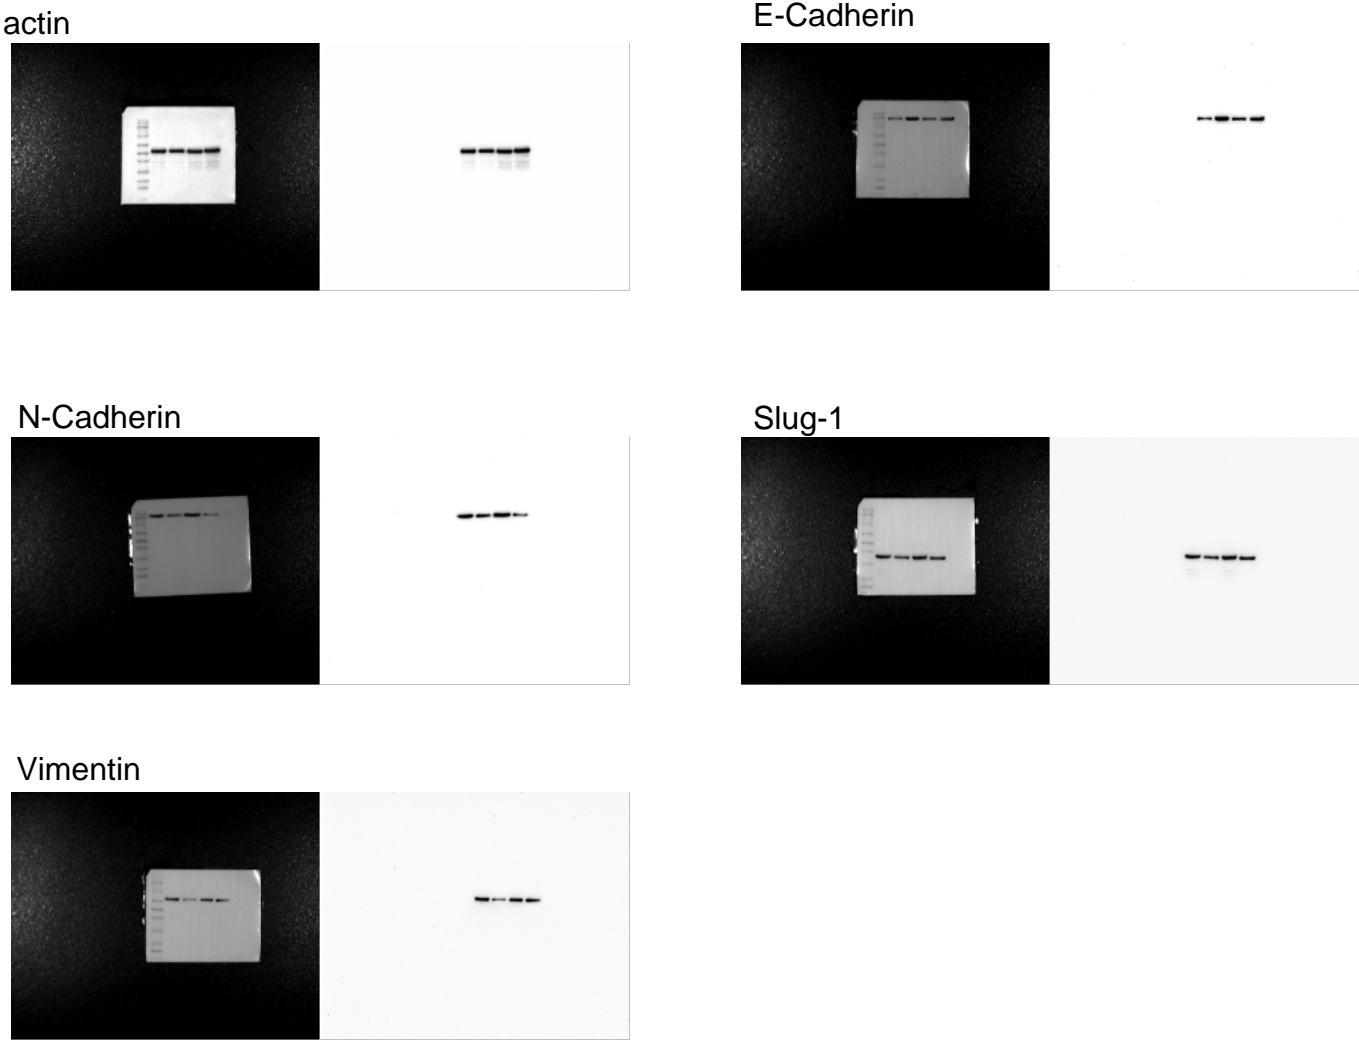

fig4A Western-blot of Bcl-2 family proteins in MCF-7 cells.

actin

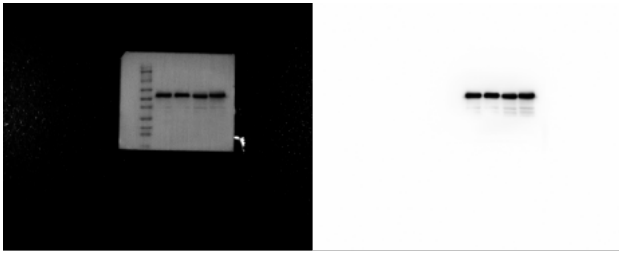

BAK

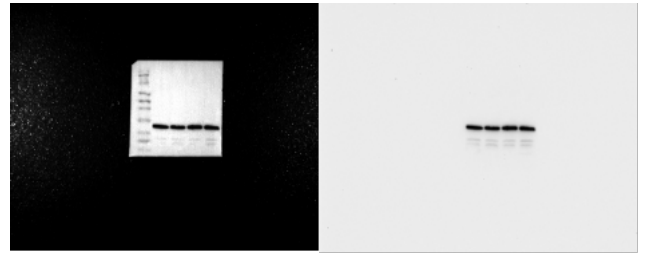

BAX

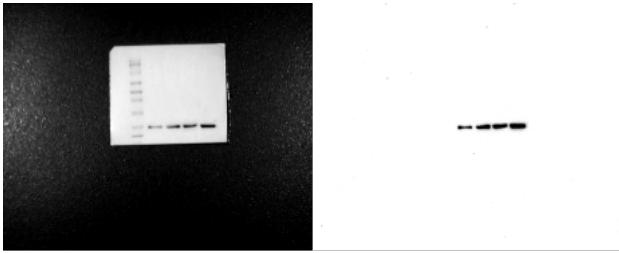

BCL-2

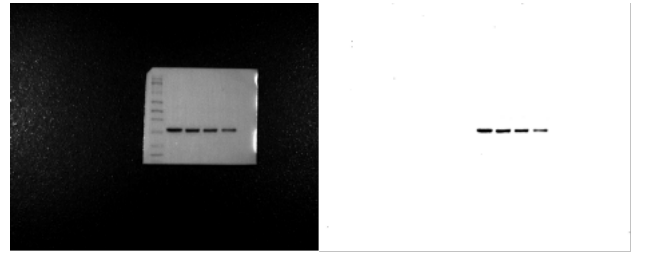

BIM-EL

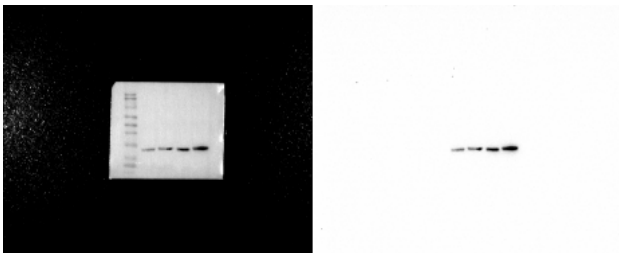

MCL-1

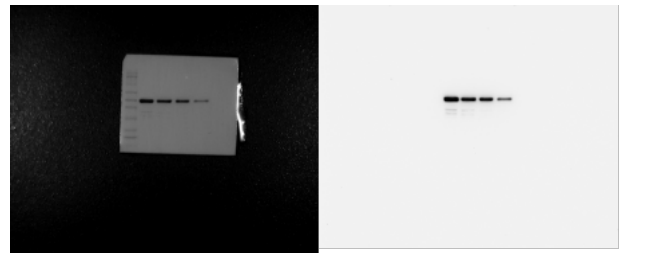

NOXA

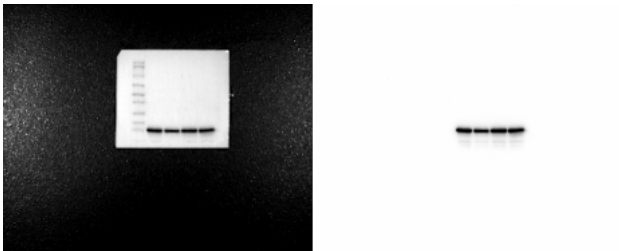

Puma

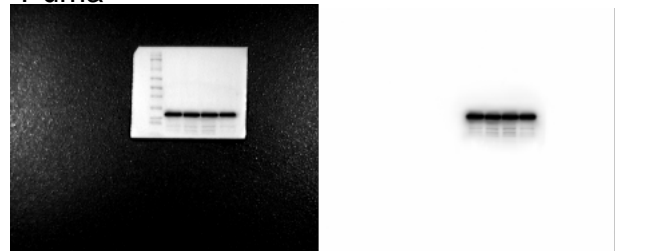

fig4B Western-blot of Bcl-2 family proteins in MDA-MB-361 cells.

actin

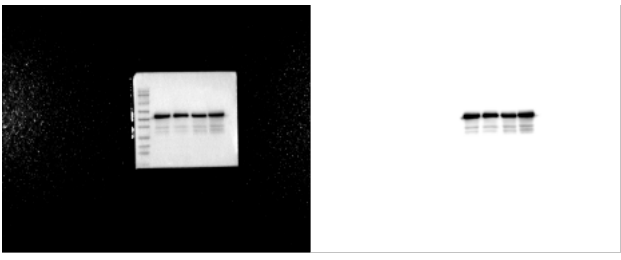

BAK

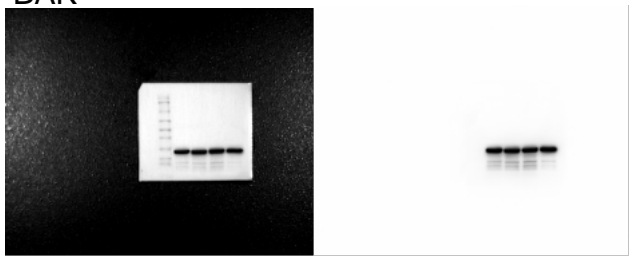

BAX

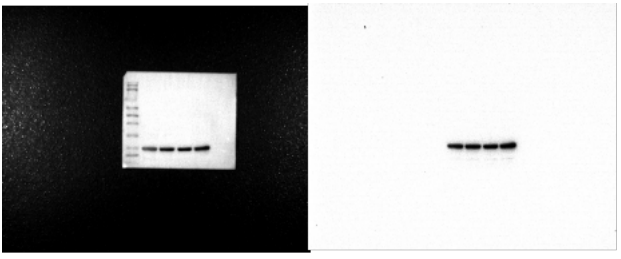

BCL-2

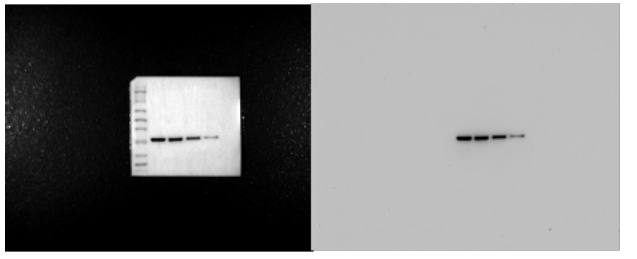

BIM-EL

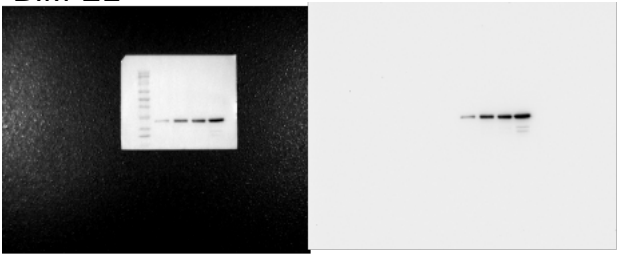

MCL-1

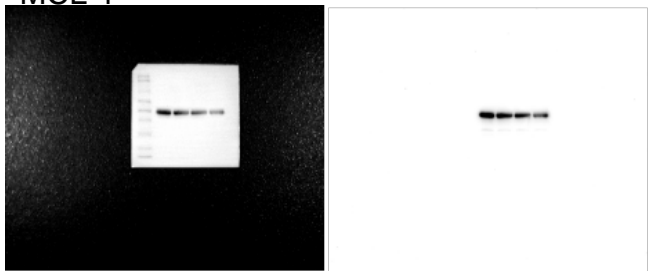

NOXA

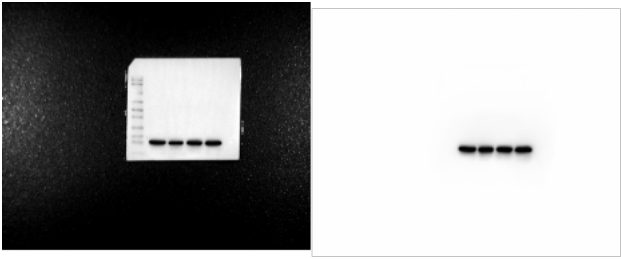

Puma

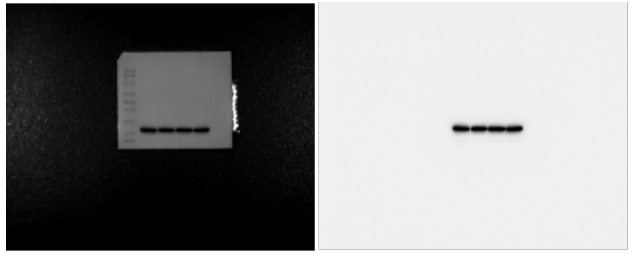

fig7A Western-blot of several essential proteins related to signaling pathways that are downstream of ROS generation in MCF-7 cells.

actin

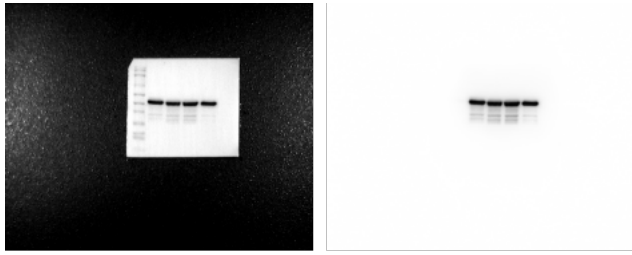

ERK

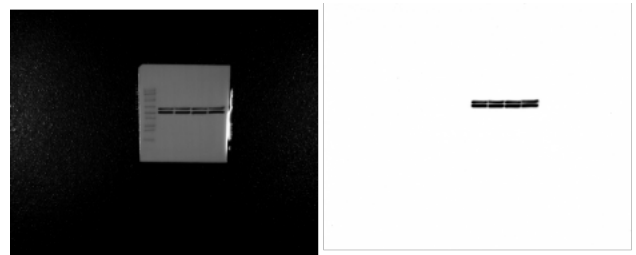

JNK

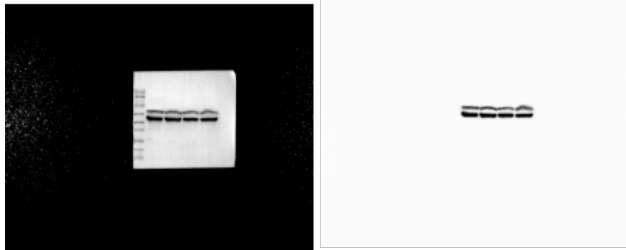

MCL-1

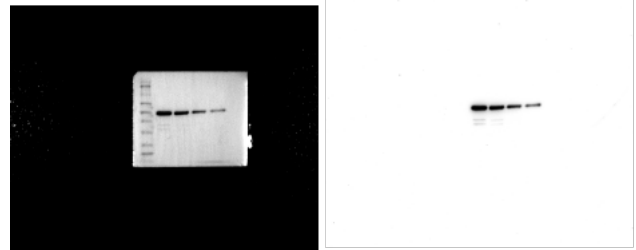

P38

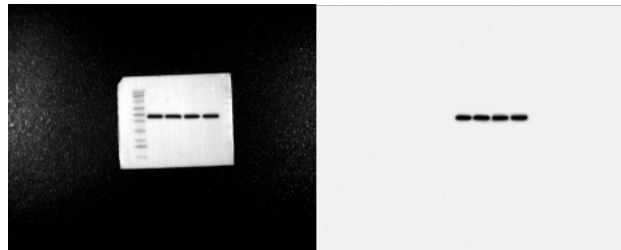

P-ERK

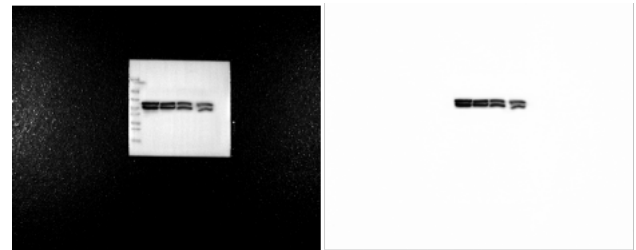

P-JNK

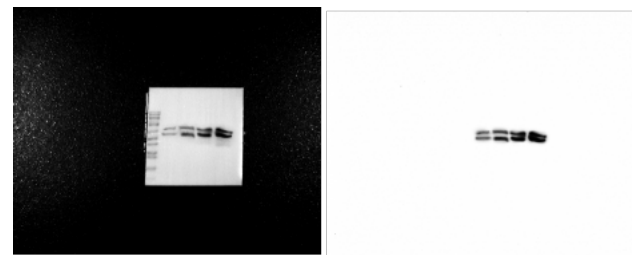

P-P38

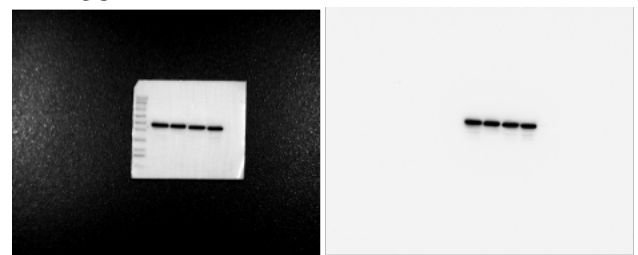

fig7B Western-blot of inhibited JNK signaling in MCF-7 cells

actin

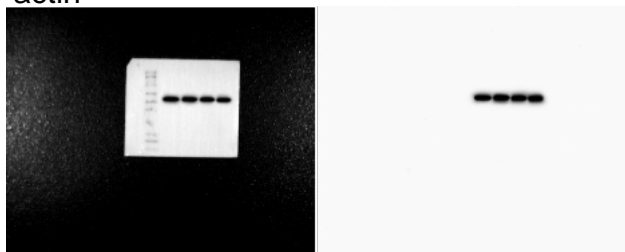

ERK

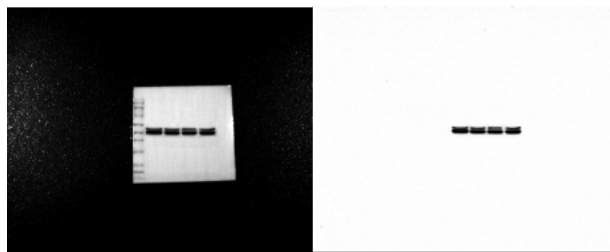

JNK

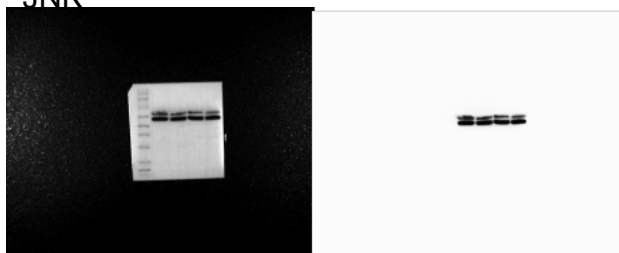

MCL-1

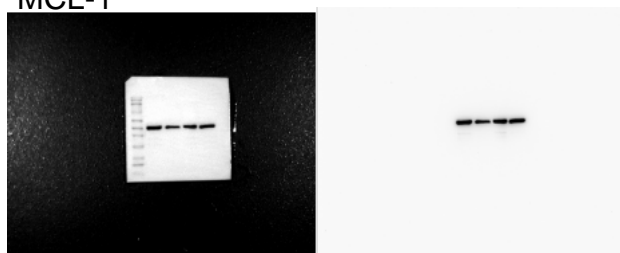

P-ERK

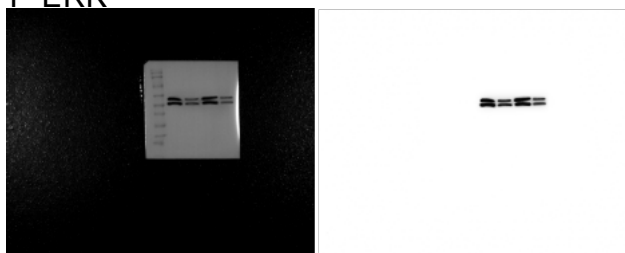

P-JNK

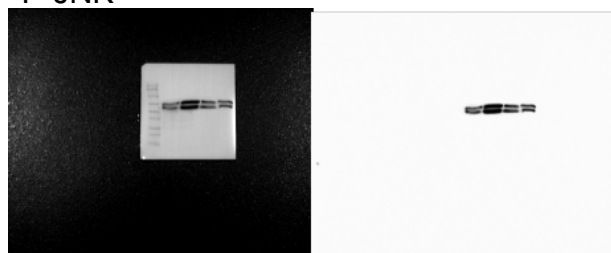

fig7B Western-blot of Overexpression of MEK1-GFP in MCF-7 cells.

actin

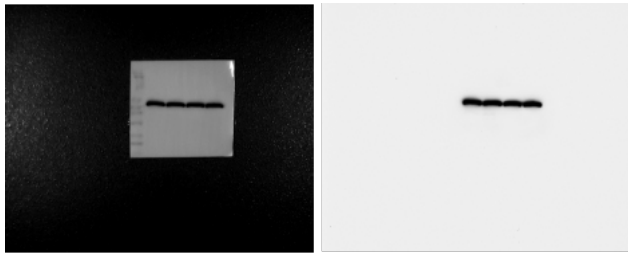

ERK

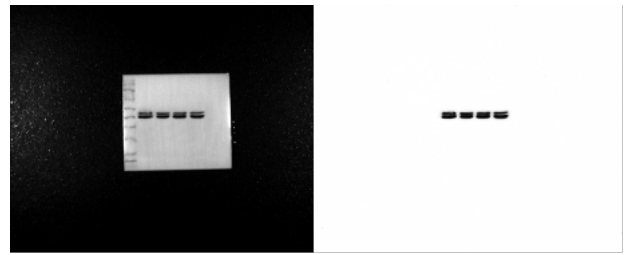

JNK

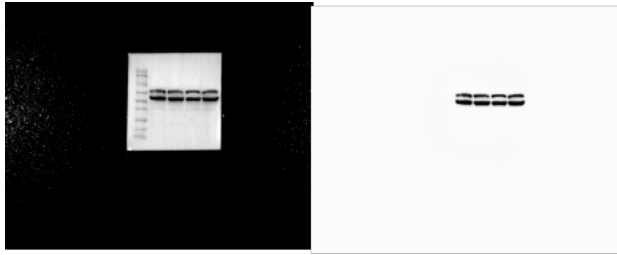

MCL-1

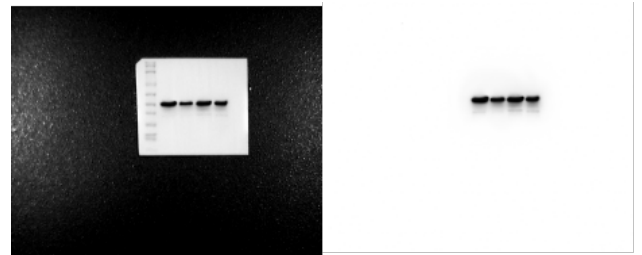

P-ERK

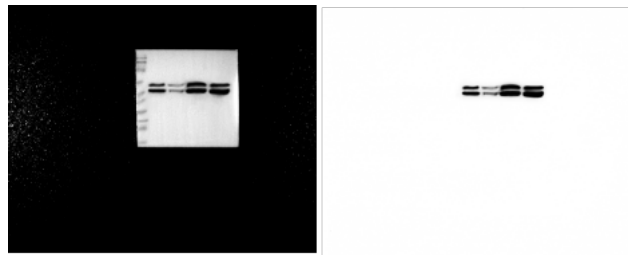

P-JNK

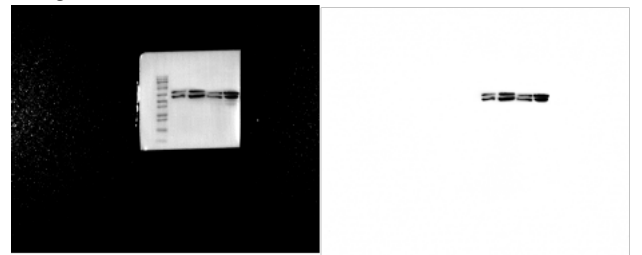

Supplement: pone.0286454.s002.pdf [file pone.0286454.s002.pdf]
